# Supplementary material
Source: Elsevier journal article supplement (https://comptes-rendus.academie-sciences.fr/physique/article/10.1016/j.crhy.2011.06.005/file/attach/mmc1.pdf)
Supplement: mmc1 [file mmc1.pdf]

## Towards a nanorisk appraisal framework

### Vers un référentiel pour évaluer le « nano-risque »<sup>1</sup>

Rye Senjen, School of Political and Social Inquiry, Sociology, Monash University, Melbourne, Australia, Tel + 61 3 9481 0145, rye.senjen@monash.edu

Steffen Foss Hansen, DTU Environment, Technical University of Denmark, DTU-Building 113, Kgs. Lyngby, DK-2800

#### *Abstract*

The paper discusses in the context of nanotechnology whether current concepts of chemical risk assessment can be used to assess nanorisk. Nanorisk can be defined from the narrow (eco) toxicological perspective to the broader sense to include societal/cultural impacts or even to the fundamental philosophical level i.e. questioning societies need for the technology. We outline here the limitations of chemical risk assessment and other recent proposed risk governance paradigms in relation to nanotechnology and nanomaterials, including, its inability to include societal risks (ownership, privacy, security, nanodivide<sup>2</sup>, convergence of nano-, bio-, etc.) and metaphysical risk (including the lay persons perspective on the risks of nanotechnology). Finally, we outline the fundamental principles and criteria that an alternative comprehensive framework should be based on.

*Keywords:* nanotechnology, nanomaterials, risk appraisal framework, types of knowledge, types of risk, metaphysical risk

#### *Résumé*

Ce papier est une discussion sur la validité des concepts habituellement utilisés dans le cadre du risque chimique, lorsqu'il s'agit d'évaluer les risques liés aux nanotechnologies, que nous appellerons nanorisques. Le nanorisque peut être défini suivant des perspectives variées, depuis celle, restreinte, du risque eco-toxicologique à celle plus large de l'impact sociétal ou culturel, voire même sous l'angle plus philosophique du questionnement de la pertinence du besoin en technologies de la société. Nous résumerons les limitations des évaluations du type "risque chimique" et de celles d'autres schémas de gouvernance récemment proposés en relation avec les nanotechnologies ou les nanomatériaux, en particulier leur incapacité à prendre en compte le risque « sociétal » (propriété de technologies, vie privée, sécurité, « fracture nano »<sup>3</sup>, convergence nano-bio, etc ..) et le risque « métaphysique » (notamment l'avis du profane sur ces risques). Finalement, nous définirons les principes fondamentaux et les critères sur lesquels un cadre prenant en compte l'ensemble de ces questions devrait être fondé.

*Mots clés:* nanotechnologie, nanomatériaux, cadre d'évaluation des risques, type de connaissance, type de risque, risque métaphysique.

---

<sup>1</sup> Traduit en français par Louis Laurent

<sup>2</sup> Gap between those who possess nanotechnologies and those don't

<sup>3</sup> Fossé entre ceux qui disposent de ces technologies et ceux qui n'en disposent pas

## Introduction

Un long chemin a été parcouru depuis que Feynman dans son désormais célèbre discours “Il y a plein de place en bas”<sup>4</sup>, en 1959, a été le premier à exposer les idées qui allaient devenir les nanotechnologies. Dans ce discours, il décrit un processus qui fait appel à des outils de précision qui pourraient permettre la manipulation individuelle d’atomes ou de molécules [1]. Le nom attribué à ce processus, « nanotechnologie », fut introduit plus tard, en 1974, par Norio Taniguchi dans le contexte des semi-conducteurs. Celui-ci définit les nanotechnologies comme l’ensemble des procédés de séparation, de consolidation et de déformation des matériaux atome par atome ou molécule par molécule [2]. Au début, les nanotechnologies furent tirées par la recherche scientifique fondamentale et par des percées scientifiques indépendantes les unes des autres, comme la découverte d’un certain nombre de nanomatériaux tels les fullerènes, les boîtes quantiques et les nanotubes de carbone, mais aussi l’invention de la microscopie à effet tunnel et la microscopie à force atomique ([3], [4], [5]).

De nos jours, les nanotechnologies constituent un domaine de recherches interdisciplinaires reconnu, mais c’est aussi une industrie qui brasse des milliards de dollars. Toutefois, l’ampleur de la contribution des nanotechnologies à l’économie mondiale est controversée. Ainsi, un récent rapport de « BCC research » affirmait, qu’à l’échelle mondiale, les recettes des ventes pour les nanotechnologies s’élevaient à 11,6 milliards de dollars en 2009, et devraient atteindre plus de 26 milliards en 2015 [6]. C’est bien sûr une contribution substantielle, mais beaucoup plus faible que celle précédemment avancée par la NSF<sup>5</sup> américaine soit mille milliards en 2015. Il y a des estimations de recettes les plus élevées, entre 1500 et 2900 milliards de dollars, fondées sur une définition plus large du marché qui inclut des produits rendus possibles par les nanotechnologies [7], plutôt que de ne considérer que les nanomatériaux, nano-dispositifs et nano-outils.

Une bonne partie de la littérature sur les nanotechnologies les présente comme le moteur de la prochaine révolution industrielle, et met en avant les incroyables avantages qu’elles apporteraient [8]. Bien que la dimension du risque ne soit, bien sûr, pas absente des décisions des politiques ou du monde de la recherche (voir par exemple [9], [10]), il est relativement rare que la problématique du risque soit abordée en détail dans un cadre unique. Un cadre particulier pourrait concerner l’un ou l’autre des risques associés aux nanotechnologies, mais aucun ne prend en compte l’ensemble des questions à traiter, ensemble qui s’étend de la question étroite du risque éco-toxicologique à celle plus large de l’impact sociétal et culturel en passant par des points plus fondamentaux comme le questionnement sur les besoins de la société en matière de technologies. Le discours dominant, qui consiste à associer progrès et innovation, privilégie des avantages présumés par rapport à des risques encore inconnus. Il est donc rare que la question du risque et celle l’innovation soient discutées à égalité, bien que ces deux sujets soient interdépendants [11].

Les acteurs non gouvernementaux (syndicats, ONG environnementales) et les commentateurs voient dans les nanotechnologies une source d’inquiétude quant à l’impact de la toxicité des nanomatériaux sur les humains et l’environnement ([9], [13], [14], [15]), voire un risque existentiel<sup>6</sup> lointain ([12]).

La société d’assurance SwissRe [82] a tiré la sonnette d’alarme en concluant, qu’en raison de leur similitude avec l’amiante, certains nanotubes de carbone pourraient avoir des effets similaires. L’amiante provoque, généralement après une longue période d’incubation, un mésothéliome, cancer qui affecte la paroi des organes internes, particulièrement les poumons et l’estomac. Des études préliminaires par Poland et ses collègues [83] ont en effet montré que des nanotubes de carbone multi-parois longs et enchevêtrés, une fois introduits dans la cavité abdominale de souris, avaient des effets pathologiques similaires à ceux de l’amiante. Fait intéressant, des nanotubes courts et enchevêtrés n’ont pas d’effet. Donaldson et al. [84] font

---

<sup>4</sup> There is plenty of room at the bottom

<sup>5</sup> National Science Foundation

<sup>6</sup> Affectant de manière grave et irréversible l’ensemble de l’humanité

l'hypothèse que d'autres nanoparticules à rapport d'aspect élevé (HARN<sup>7</sup>) provoquent aussi une inflammation des poumons voire même induisent des mésothéliomes.

En revanche, beaucoup de scientifiques compétents et de décideurs politiques semblent supposer que les nanotechnologies et les nanomatériaux sont relativement sûrs et que les préoccupations sur les risques sont exagérées [16]. Cette asymétrie apparente entre avantages escomptés des nanotechnologies et dommages imprévus qu'elles peuvent occasionner, fait que les bénéfices apparaissent plus immédiats, identifiables et prévisibles, surtout pour les acteurs de ces technologies. Les dangers possibles et encore cachés tendent à s'estomper et à devenir plus improbables dans la mesure où on insiste sur les bénéfices [17].

Des questions clés dans le contexte ci-dessus sont alors « qui est responsable des risques », « qui supporte ou supportera les coûts » et « qui va évaluer et gérer les risques » et « quels principes et critères seront utilisés pour guider l'évaluation et gérer des risques connus et inconnus ».

De nombreux commentateurs (par exemple [18], [19]) font l'analogie entre organismes génétiquement modifiés (OGM) et nanotechnologies. Ils tirent des leçons de l'opposition aux OGM en matière de risques, notamment sur le danger que présente une mauvaise communication ou gestion en matière de nanotechnologies, et sur la nécessité de traiter les problèmes sociétaux et la dimension éthique des nanotechnologies, s'il s'agit d'assurer « l'acceptation » des nanotechnologies par le plus grand nombre. Un nombre croissant de gouvernements a aussi compris qu'au 21<sup>ème</sup> siècle, la confiance du public et l'acceptation des nouvelles technologies étaient des conditions nécessaires pour l'adoption de nouvelles technologies [20] même si ce n'était pas chose facile. Un point clé dans cette analogie est qu'elle incite à penser que l'engagement du citoyen doit surtout servir à rendre acceptables les innovations technologiques et à éviter les résistances, plutôt qu'à donner au citoyen un rôle actif dans l'orientation des innovations technologiques. Cette dernière option nécessiterait qu'il soit impliqué à travers divers processus démocratiques dans la fixation des objectifs et des limites des (nano) technologies et sur la manière dont ces objectifs seraient poursuivis. Il reviendrait alors à la recherche et à l'industrie de traduire ces objectifs en technologies économiquement viables, tout en tenant compte des contraintes sociétales ([21]).

Dans cet article, nous discuterons tout d'abord de la nature des risques et particulièrement des risques « nano » et de la manière dont certains envisagent de transposer les méthodes d'évaluation du risque chimique au risque « nano ». Nous esquisserons ensuite les limites de l'évaluation des risques chimiques et d'autres modèles de gestion des risques proposés récemment pour les nanotechnologies et les nanomatériaux. Parmi ces limites, leur incapacité à prendre en compte les risques sociétaux : droit de propriété, vie privée, sécurité, fracture nano (c'est-à-dire déséquilibre nord-sud à l'échelle de la terre), convergence nano-, bio-, etc) ; et aussi les risques métaphysiques (y compris ceux perçus par le profane). Enfin, nous exposerons les principes fondamentaux et les critères qui devraient être à la base d'une structure globale alternative.

## **Compréhension actuelle de ce que sont les risques et en particulier les nanorisques.**

Renn [22] définit le risque de manière globale comme « la probabilité qu'une réalité indésirable (effets négatifs) puisse survenir, suite à des événements naturels ou des activités humaines ». A son niveau le plus général, cette définition implique qu'il y ait des effets (positifs ou négatifs) et qu'à ceux-ci on attribue une probabilité (ce qui traduit l'incertitude), en tenant compte du contexte dans lequel ces effets interviennent. Techniquement, le risque est la probabilité qu'un effet indésirable (danger) se produise, multipliée par l'ampleur de son impact [23].

---

<sup>7</sup> Pour "high aspect ratio nanoparticles", c'est à dire en forme de fibre

Traditionnellement et dans de nombreux schémas d'évaluation des risques (techniques, mathématiques ou fondés sur des modèles), le risque est perçu comme un risque physique - c'est à dire des dommages physiques aux êtres humains, aux artefacts culturels ou aux écosystèmes. Les événements indésirables sont moyennés dans le temps et dans l'espace et on se sert de lois de probabilité pour estimer dans quelle mesure ces événements se produiront. [22]. Le risque est alors défini comme l'effet d'un tel événement (danger) multiplié par l'exposition à ces événements.

Les principaux risques des nanotechnologies ont été définis par divers auteurs. On peut les classer selon les rubriques suivantes :

- **Santé humaine et environnement** : Les risques sont des effets négatifs sur la santé humaine, un impact sur les organismes vivant dans l'environnement ou sur la structure et le fonctionnement des écosystèmes.
- **Maitrise des technologies et de leurs conséquences** : On peut craindre des situations où des acteurs coopèrent pour développer des technologies qui peuvent être d'une grande utilité pour la société, sans qu'ils soient toutefois tenus responsables si ces technologies s'avéraient comporter des risques.
- **Confidentialité, sécurité, surveillance et amélioration de l'humain**. Cette catégorie traite des « nano-espions » (caméras et dispositifs de surveillance miniatures), les organes artificiels et les muscles à base de nanotechnologies et de nanomatériaux.
- **L'égalité d'accès, et les impacts sur les économies nationales**. L'égalité d'accès à la technologie est menacée parce que la R & D<sup>8</sup> en nanotechnologie est fortement consommatrice de ressources et c'est aussi une technologie qui pourrait donner des avantages compétitifs à certains. Cela peut perturber les économies nationales, des industries voire des sociétés à un rythme jamais vu ou connu précédemment.
- **La participation du public** au développement de la technologie. Le risque est le manque d'implication du public dans des décisions d'investissements de R & D concernant un niveau substantiel de fonds publics et celles sur les domaines d'application [24].
- **L'émergence d'une « fracture nano »**. La R & D en nanotechnologie est chère et toutes les économies ne peuvent avoir accès égal à leurs bénéfices. Cela fait craindre une fracture entre le Nord et le Sud de la Terre [25].
- Préoccupations concernant l'évolution et la **convergence des nanotechnologies, de la biologie et technologies de l'information**, c'est-à-dire le développement d'artefacts mêlant technologies de l'information, organismes vivants, intelligence artificielle. Dans le cas extrême, des cyborgs [26].

## Le paradigme d'évaluation du risque chimique peut-il être appliqué aux nanotechnologies ?

Dans la plupart des pays, la réglementation des nanomatériaux dépend fortement des données (éco) toxicologiques et des évaluations des risques. Lorsqu'il s'agit d'évaluation des risques des nanomatériaux, on l'assimile souvent de manière restrictive à une simple extension du cas des risques chimiques, avec quatre rubriques : identification des dangers, évaluation de la relation dose-réponse, évaluation de l'exposition et caractérisation des risques.

Dans un certain nombre d'études, les auteurs déclarent avoir évalué ou modélisé des risques pour des nanomatériaux précis comme un additif pour le carburant diesel à base d'oxyde de cérium (CeO<sub>2</sub>) au Royaume-Uni [27], les nano particules d'argent (nano-Ag) et de dioxyde de titane (nano-TiO<sub>2</sub>), et les nanotubes de carbone (NTC) en Suisse [28]. Par exemple, Park et al. [27] ont conclu qu'« il est hautement improbable que l'exposition à l'oxyde de cérium aux concentrations présentes dans l'environnement (déduite à partir de mesures et de modélisations) puisse induire une inflammation pulmonaire ». En considérant les niveaux

---

<sup>8</sup> Recherche et développement

d'exposition pour le pire des cas, Mueller et Nowack [28] trouvent que le quotient de risque<sup>9</sup> pour le nano-Ag et les NTC est inférieur à  $10^{-3}$ , et ils affirment que leur modélisation suggère qu'il y a peu ou pas de risque associé à ces nanomatériaux pour les organismes vivant dans l'eau et dans l'air. D'un autre côté, le nano-TiO<sub>2</sub> pourrait constituer un risque pour les organismes vivant dans l'eau, les quotients de risque allant de 0,7 à 16. Ceux-ci n'ont pas pu être déterminés pour les sols faute de données. En examinant les travaux de Park et al. [27] d'une part, et Muller et Nowack [28] d'autre part, on constate clairement que chaque élément de l'évaluation des risques présente des limitations d'ordre général ou spécifique.

En matière de risques chimiques, **l'identification des dangers** peut être décrite comme «*l'identification des effets indésirables qu'une substance est intrinsèquement capable de provoquer*» [29]. Mais que faire si, comme dans le cas de nombreux nanomatériaux, les effets négatifs potentiels sur la santé humaine et l'environnement sont encore spéculatifs et infondés. Il est encore pratiquement impossible de relier systématiquement les caractéristiques des nanoparticules et les effets observés, ce qui permettrait une identification efficace des dangers [30].

**Le deuxième élément** de l'évaluation des risques chimiques, à savoir la relation dose-réponse, porte aussi en elle-même un certain nombre de limitations, quand il s'agit de nanomatériaux. Cette relation implique «*... une estimation de la relation entre la dose, ou le niveau d'exposition à une substance, et l'incidence et la gravité de l'effet*» [29]. Dans le cadre des nanotechnologies, le problème est que, alors que conventionnellement on se réfère à des doses en termes de masse, les premières indications suggèrent que l'activité biologique des nanoparticules pourrait dépendre, non pas de la masse, mais plutôt de leurs propriétés physico-chimiques. Le problème est qu'actuellement ces propriétés ne sont pas systématiquement prises en compte dans les études de toxicité [31]. En outre, il reste difficile de savoir si un seuil en dessous duquel il n'y a pas d'effet peut être établi, seuil qui reste le meilleur descripteur du danger et pourrait être le paramètre le plus pertinent à prendre en compte [30].

Suite à cela, Hansen et al. [32] ont proposé que, lors de l'estimation des risques des nanomatériaux, il faille considérer les informations pertinentes pour décrire leurs caractéristiques physico-chimiques à savoir la composition chimique, la taille, la forme, la structure cristalline, la surface et son activité chimique, la charge de surface, la solubilité et l'adhérence ([33], [34], [35], [36], [37], [38], [39], [40], [41], [42]). Malheureusement, pour la plupart des nanoparticules testées, les informations sur une bonne partie de ces propriétés sont encore largement indisponibles. Ce manque d'information rend alors difficile l'identification des principales caractéristiques des nanomatériaux, ou de leur combinaisons, qui seraient à l'origine des risques décrits dans les études (éco) toxicologiques. En outre, il est concevable que des propriétés non encore identifiées dans la littérature scientifique puissent être pertinentes pour l'identification des dangers de certains nanomatériaux.

**Troisième élément** de l'évaluation du risque chimique, l'évaluation de l'exposition est un autre facteur clé puisque, sans exposition, il n'y a pas de risque. L'évaluation de l'exposition consiste en «*...une estimation des concentrations / doses auxquelles les populations humaines (à travers l'activité professionnelle travailleurs, la consommation, l'environnement) ou les compartiments de l'environnement (aquatique, terrestre et aérien) sont ou peuvent être exposés*» [29]. Mais les nombreuses informations (conditions de fabrication, niveau de production, applications industrielles et usages, produits de consommation, comportement, des consommateurs, devenir et distribution dans l'environnement) requises pour évaluer de manière crédible les expositions ne sont pas encore disponibles pour la plupart des nanomatériaux. De plus, l'évaluation est perturbée par la difficulté à contrôler l'exposition aux nanomatériaux sur le lieu de travail et dans l'environnement. C'est en partie dû au fait que les voies biologiques et environnementales empruntées par les nanomatériaux sont encore largement inexplorées [43] et inconnues ; et en partie à la rareté des connaissances et au manque d'accès à l'information, ce qui nuit au réalisme des évaluations d'exposition.

---

<sup>9</sup> Concentration à laquelle on estime que le sujet est exposé divisée par celle où apparaissent des effets nocifs

Par ailleurs, pour évaluer pleinement l'impact potentiel des nanomatériaux, il faut également disposer d'informations sur leur cycle de vie ; par exemple les quantités produites de nanomatériaux bruts, les produits de consommation en contenant mis sur le marché, les transferts dans l'air et dans l'eau, leur usage dans le traitement des eaux usées, les quantités et les types de nanomatériaux déchargés dans les sites d'enfouissement, ou stockés ou traités comme déchets, l'ampleur des rejets accidentels, et les utilisations intentionnelles de nanomatériaux pour la dépollution et le traitement [44].

Resnick et Tinkle [45] décrivent les risques inhérents aux nanomatériaux pour les humains et les animaux à travers le concept de voie d'exposition. Ils affirment que, en raison de la diversité des nanomatériaux, on ne peut rien dire de général sur leur innocuité, et qu'ils doivent donc être considérés plus ou moins individuellement. Un aspect essentiel pour chaque nanomatériau est ses propriétés physico-chimiques, sa taille et sa forme. Ces propriétés, à leur tour, dépendent du microenvironnement auquel il est exposé. Ces propriétés peuvent ainsi changer quand un matériau pénètre dans l'organisme ou quand son microenvironnement change de quelque autre manière.

La caractérisation des risques est l'étape finale, lorsque toutes les informations recueillies au cours des trois premières étapes<sup>10</sup> sont assemblées [43]. Souvent, la caractérisation du risque se résume à l'estimation d'un quotient de risque, défini comme le rapport entre les concentrations prédites auxquelles il y a exposition et les concentrations seuils en dessous desquelles on n'observe ou ne prédit aucun effet. Si ce quotient de risque est inférieur à un, aucun autre essai ou mesure pour réduire les risques ne sont nécessaires, alors que d'autres tests peuvent être initiés pour baisser le quotient si celui-ci est supérieur à un. Si le quotient de risque ne peut pas facilement être abaissé en dessous de un, le risque doit être réduit [29]. Quand il s'agit de nanomatériaux, chacun des trois premiers éléments de l'évaluation des risques est sujet à des limitations comme indiqué ci-dessus. La caractérisation des risques, qui est en bout de chaîne, est affectée par ces limitations de manière additive voire multiplicative.

De nombreuses commissions d'experts de haut niveau ont passé en revue l'état de l'art des connaissances sur l'impact des nanomatériaux sur l'environnement, la santé et la sécurité. Un accent considérable a été mis sur l'identification des connaissances manquantes et pour fournir des recommandations sur la manière de traiter et de combler ces lacunes [46]. Powell et al. [44] et Grieger et al. [46] identifient un certain nombre d'inconnues au sujet des nanomatériaux, y compris, la façon de les caractériser et les paramètres qu'il conviendrait de mesurer, l'absence de données en toxicité / écotoxicité, des données limitées sur le sort des nanomatériaux dans l'environnement et sur l'exposition humaine ou environnementale. Cette emphase sur le manque de connaissances scientifiques, conduit directement à la croyance communément admise que, une fois que des «données scientifiques» sur la toxicologie et les impacts environnementaux auront été disponibles, une évaluation "objective" des risques sera possible et que cela permettra de prendre des décisions en connaissance de cause dans un délai raisonnable, ceci malgré les grandes incertitudes qui existent aujourd'hui sur les risques des nanotechnologies et des nanomatériaux.

Brown [47] appelle ceci le «nouveau modèle du déficit». Il affirme qu'il a aussi peu de validité que le premier modèle du déficit [81], qui attribuait le manque de connaissances au grand public. Le *nouveau modèle du déficit* omet de reconnaître que la question clé pour les nanotechnologies n'est pas le manque de connaissances, mais la manière de réglementer dans un contexte d'incertitudes fondamentales, en particulier le fait qu'il sera ardu de calculer les données toxicologiques pour de nombreux types de nanomatériaux ne serait-ce parce qu'un type donné de matériaux peut être produit avec des dizaines de variantes.

De plus, dans l'évaluation des risques des nanotechnologies et des nanomatériaux pour l'environnement, la santé et la sécurité, on privilégie habituellement la connaissance scientifique, qui peut être mesurée, évaluée et surveillée. C'est ignorer l'importance par exemple des risques métaphysiques (voir ci-dessous), celle des valeurs, de l'éthique et des formes tacites de la connaissance [47], lorsqu'il s'agit de porter un jugement sur

---

<sup>10</sup> Identification des dangers, relation dose-réponse, évaluation de l'exposition

des risques. Inévitablement plusieurs jugements de valeur peuvent intervenir et, en laissant certains à l'écart lors de l'évaluation des risques fait qu'on tend à les sous-estimer. En outre, cela donne trop d'importance aux experts techniques et donc met à l'écart le grand public, qui devrait être impliqué et avoir son mot à dire dans l'évaluation des risques ainsi pour leur gestion [48].

Shrader-Frechette soutient que la prise de décision dans une société (en matière de gestion des risques) met en jeu des questions de droit, les obligations des acteurs, les conséquences éthiques liées au bien-être des personnes, tandis qu'une prise de décision sur des bases purement scientifiques prend en compte des conséquences largement épistémologiques [49]. Par conséquent, la décision de savoir si une société doit accepter une technologie donnée ne doit pas être laissée aux évaluateurs des risques/scientifiques, mais elle est du ressort des politiques qui ont le mandat démocratique pour prendre de telles décisions. Bien sûr, cela ne signifie pas que les politiciens devraient être autorisés à manipuler l'évaluation des risques afin de servir leurs propres objectifs mais que, dans le processus d'évaluation des risques, les décisions liées à des valeurs, devraient être laissées aux politiques.

### Etendre le paradigme conventionnel de l'évaluation des risques

Il peut être nécessaire de considérer la notion de risque des nanotechnologies et de leur évaluation dans un contexte beaucoup plus large. L'hypothèse implicitement associée au paradigme conventionnel de l'évaluation des risques est que les incertitudes associées aux prédictions peuvent être connues ou estimées. Toutefois, ce n'est pas toujours le cas et, même quand ces incertitudes sont identifiées, elles sont l'objet d'un certain nombre de biais ou de problèmes de prédictibilité bien connus [50]. Par exemple, les résultats d'une évaluation fondée sur une approche scientifique dépend du genre de questions qui sont posées ou non, de comment et par qui elles sont posées et des hypothèses sous-jacentes à ces questions [23]. Une partie de cela constitue un « biais structurel », dans la mesure où intérêts matériels communs, caractéristiques sociales et perception du risque sont intriqués [51].

L'imprévisibilité est particulièrement prononcée en ce qui concerne les systèmes complexes. Un certain nombre d'auteurs ont estimé ([23], [52]) que les inventions technologiques, comme les nanotechnologies, interfèrent avec les systèmes complexes à plusieurs niveaux et peuvent donc provoquer de nouveaux effets sans précédent, pratiquement impossibles à atténuer. Dupuy soutient, qu'au moins pour certains objets nanométriques complexes, nous ne serons pas en mesure de prédire comment ils se comporteront, tant que nous ne les aurons pas créés [52]. Dans le cadre de la gestion globale des risques, il est donc essentiel que les alertes précoces soient enregistrées et prises en compte, à savoir que des procédures soient mises en place pour autoriser la production et la vente de biens qui pourraient causer des dommages aux humains ou à l'environnement, irréversibles dans le long terme.

Pour prendre en compte cette imprévisibilité Wickson et al. [23] introduisent le concept d'incertitude pour l'évaluation des nanotechnologies. L'idée que l'évaluation des risques modernes est ou devrait être affectée par différents types d'imprécision (appelés collectivement *l'incertitude*), fut d'abord proposée par Wynne, dans le contexte de la production de connaissances scientifiques et de la politique environnementale [53]. Cette typologie comprend :

- le **risque** - la probabilité est calculable, les connaissances sont suffisantes,
  - l'**imprécision** - la probabilité ne peut encore être calculée, les connaissances sont encore insuffisantes,
  - l'**indétermination** - la connaissance est conditionnelle et peut se révéler fautive,
  - l'**ambiguïté** - un certain nombre de repères différents doivent être utilisés pour le calcul
- et
- l'**ignorance** - nous ne savons pas ce que nous devrions calculer.

Selon Wickson et al. [23], cette typologie nous permet de réaliser à quel point l'évaluation des risques ne prend pas en compte *l'incertitude* qualitative. Elle met aussi en évidence les biais scientifiques en termes de vision du monde, d'hypothèses et d'intérêts des protagonistes. Cette typologie ne prend toutefois pas en

compte le risque du point de vue la philosophie morale, ni ne donne des directives sur la façon d'évaluer concrètement des risques (voir ci-dessous).

Pour prendre en compte le risque d'un point de vue moral, Hansson se propose de l'étudier en termes d'exemption, c'est à dire le droit qu'a une personne, de prime abord, à ne pas être exposée à des effets nuisibles par les actions des autres. La question est alors « *sous quelles conditions ce droit fondamental peut-il être outrepassé ?* ». Ou, pour reformuler le problème, « *sous quelles conditions a-t-on le droit d'exposer autrui à un risque ?* » [50]. La règle que propose Hansson est « *personne ne devrait être exposé à un risque à moins que cela ne fasse partie d'un compromis social équitable, qui associe ce risque à un bénéfice* » [50]. Cette règle change de manière significative la manière d'envisager les risques. Dans ce cadre, chaque personne exposée au risque devient un individu souverain, plutôt qu'un agent anonyme caractérisé par services ou des probabilités. Plutôt que de proposer (comme c'est le cas conventionnellement), qu'il est acceptable d'exposer quelqu'un à un certain niveau de risque (considéré comme « sûr »), en utilisant les méthodes de calcul exposées ci-dessus, une justification de cette exposition doit être donnée, par exemple un bénéfice qui fait que l'individu accepte d'être exposé.

### **Alternatives à l'évaluation conventionnelle des risques**

Les personnes en charge des réglementations, l'industrie, des toxicologues et des économistes de premier plan ont tendance à discuter du risque des nanomatériaux dans le cadre restreint des risques physiques, de l'évaluation des risques chimiques et d'une analyse coût-bénéfice. Cette approche est celle qui prévaut dans les milieux scientifiques et industriels, et est supposée avoir été utilisée avec succès dans le passé (même si de nombreux exemples ne vont pas dans ce sens). D'autres acteurs, tels que les ONG, le public, des chercheurs plus progressistes voient le « nanorisque », ainsi que d'autres risques (par exemple issu de substances chimiques ou d'OGM) de manière plus globale et prennent en compte les questions sociétales telles que « l'équité », « le consentement », « le fait que le risque soit familier », « le potentiel catastrophique », et « la répartition risque-bénéfice entre les groupes sociaux » [54], [55].

Un cadre de gouvernance des risques issus des nanotechnologies a été suggéré, ceci afin d'élargir le cadre conventionnel et de répondre à certaines préoccupations, [56]. Un cadre de gouvernance des risques est avant tout une réponse politique à des risques, ce mot étant à comprendre au sens large, visant à élargir les méthodes conventionnelles d'évaluation des risques. Le concept de gouvernance déplace également la responsabilité de l'Etat (celui qui gouverne ainsi que ses émanations impliquées sur ce sujet) vers un ensemble plus diffus d'« acteurs » ou de « parties prenantes », qui tous sont alors impliqués dans « *les conventions, règles, processus et mécanismes liés à la collecte de l'information sur les risques, son analyse et sa diffusion, et liés à la prise de décision* » [56]. Elle peut également inclure des accords entre institutions et des idées politiques, y compris les différentes perceptions du risque.

Le comité international sur la gouvernance des risques (CIGR<sup>11</sup>) a proposé un cadre général de gouvernance, applicable également au cas des nanotechnologies [56]. A première vue, ce cadre peut prendre en compte non seulement l'évaluation des dommages physiques, mais des questions plus larges, y compris des problèmes de société, la participation des parties prenantes et des incertitudes. Il tente de gérer différents types de risque et les procédures d'évaluation associées, en considérant quatre générations successives de nanotechnologies: les nanostructures passives (depuis 2000), les nanostructures actives et les nanodispositifs (depuis 2005), les nanosystèmes intégrés (après 2010) et les nanosystèmes moléculaires hétérogènes (après 2015). L'évaluation des risques pour chaque génération dépend du type de connaissances associées à cette technologie et de l'hypothèse que moins de connaissances sont disponibles sur des technologies imaginées ou actuellement au stade de prototype qui seraient commercialisées dans un avenir plus ou moins lointain.

---

<sup>11</sup> Voir <http://www.irgc.org/>



Bijker et al. ont critiqué cette structure chronologique, affirmant que ce sont le but et l'usage d'une technologie qui en déterminent le risque, plutôt que sa nature, et ceci indépendamment de la date d'introduction sur le marché [57]. La participation du public en tant que partie prenante est un élément pour la prise en compte des valeurs dans l'évaluation des technologies comme les aspects éthiques et sociaux. Mais cet apport est encore perçu comme un élément de plus à prendre en compte, dans le cadre d'un processus qui reste piloté par des experts, plutôt que de permettre la montée en puissance des citoyens et une forme de co-gouvernance [58].

Dans un sens plus large, le projet du CIGR ainsi qu'un rapport ultérieur au sujet d'une approche de gouvernance du risque des nanotechnologies [59] ont aussi proposé un cadre qui a tenté d'englober : analyse risque-bénéfice, environnement, santé, sécurité aussi bien qu'aspects éthiques, légaux et sociaux. L'évaluation globale des risques et du cadre de gestion y est cyclique, et semble ouvert à la possibilité d'adaptation. Toutefois, l'évaluation des risques se subdivise en l'évaluation quantitative des risques (c'est à dire l'évaluation «scientifique» traditionnelle) et l'évaluation des préoccupations (perception du risque, aspects sociaux, impact socio-économique), et il pourrait être tentant, même si cela n'est pas intentionnel, de tomber dans le piège de ne considérer que la première (scientifique) comme légitime, et de percevoir la seconde comme «politique », donc d'un poids ou d'une légitimité différents.

## Nanotechnologies et risque métaphysique

Un problème avec l'évaluation des risques chimiques et leur gestion ainsi qu'avec le cadre de gouvernance des risques proposés par CIGR est que ceux-ci ne prennent que rarement en compte, voire jamais, ce que nous appelons le risque métaphysique (pour les nanotechnologies mais aussi en général). Il s'agit du risque pour la société et les individus, implicitement évoqué par certains philosophes, comme résultant de la « reconceptualisation » de la nature qu'implique le projet métaphysique des nanotechnologies. Suivant Popper et son prédécesseur Meyerson, Dupuy définit un projet métaphysique comme «*un ensemble de présupposés sur la structure du monde qui ne sont ni vérifiables ni falsifiables par l'expérience, mais qui jouent pourtant un rôle essentiel dans les progrès de la science* » [60].

Quel est donc le projet métaphysique des nanotechnologies et quel genre de risques pourrait-il induire ? Selon Dupuy, le risque (et c'est un risque existentiel pour l'humanité) se résume à la notion de révolte de la technoscience contre la condition humaine. La technoscience est ici la science qui vise la fabrication d'outils et de dispositifs, pour laquelle transformer et connaître sont intimement liés, par opposition avec la science classique dont l'objet est d'observer et de comprendre la nature [61]. Pour Dupuy, la question n'est pas de savoir si nous devrions changer et élargir les caractéristiques humaines (par exemple en termes d'amélioration de l'homme) et ce que cela pourrait signifier pour nous-mêmes, mais ce que cela signifie d'être humain au sens de la condition humaine, c'est-à-dire ce que cela signifie pour nous d'être humain et si les nouvelles technologies peuvent changer cela. En remontant à Hannah Arendt, il définit la condition humaine comme résultant d'une combinaison de choses données (l'environnement / la nature / nos gènes) et de choses fabriquées par les humains. Cette révolte de la technoscience contre la condition humaine se manifeste dans le rêve de vaincre / abolir la mort et l'avènement d'une vie éternelle telle qu'elle apparaît dans de nombreux textes sur les technologies convergentes et les nanotechnologies (qu'il s'agisse de fiction et de non-fiction). Dupuy souligne en outre que cette révolte n'est pas seulement dirigée contre la finitude de l'homme, mais aussi contre la honte d'être né plutôt que d'avoir été fabriqué - cette «*nausée existentielle de savoir que l'homme n'est pas le fondement de son être propre*» [60]. Pour Dupuy, le but du projet métaphysique sous-jacent aux nanotechnologies est de transformer l'homme en créateur, de se révolter contre l'existant et le dépasser. Le projet métaphysique est alors de redéfinir la nature et la vie comme des artefacts et ensuite de transformer la nature en artefact, de la rendre artificielle [52].

Nordman observe également que le projet des technosciences, les nanotechnologies jouant un rôle clé, consiste à utiliser «la nature pour aller au-delà de la nature». Le projet «avec la nature au-delà de la nature»,

dans la pratique, « ne réduit pas l'esprit et la culture à la matière et la nature, ni ne célèbre la création scandaleuse d'hybrides ou de monstres. Au lieu de cela, il dissout simplement la différence entre les catégories que sont la science et la technologie, la nature et la culture ... dans l'idiome de l'ingénierie [62] ».

Dupuy suggère que, dans le contexte de ce projet métaphysique, la question clé d'un point de vue éthique ne serait donc pas comment gérer le risque, mais comment développer de nouveaux concepts de prudence [52] et peut-être remplacer et / ou d'améliorer la gestion des risques par la prudence. « Prudence » ne signifie ici pas tant « précaution », mais l'application de quatre questions relatives aux valeurs comme l'a souligné Flyvbjerg [63] et d'y répondre non pas en termes de technoscience, mais sous la forme d'une plus grande capacité de la société à répondre à ces questions :

- Où allons-nous?
- Qui gagne et qui perd, par quels jeux de pouvoir?
- Est-ce un développement souhaitable?
- Que devrions-nous faire?

## Les réactions du profane au risque métaphysique

On affirme fréquemment que ce sont surtout des facteurs psychologiques qui déterminent la réaction du profane au risque. En particulier, sa perception du risque serait souvent influencée par divers facteurs tels que le fait que l'exposition au risque soit involontaire ou qu'elle soit une violation de valeurs sociétales. Ces questions ne sont généralement pas abordées dans l'évaluation scientifique des risques. Il ya aussi la croyance répandue parmi les experts et les décideurs que, si on informe suffisamment les citoyens pour les convaincre que les avantages d'une technologie l'emportent sur les risques et / ou si le débat a lieu suffisamment tôt, alors les citoyens auront tendance à trouver la technologie acceptable et surmonteront leurs craintes [64]. Cela est également connu sous le nom de paradigme du déficit [47].

**Premièrement**, cette position fait implicitement l'hypothèse que les experts connaissent le vrai risque et, comme Shrader-Frechette le soutient, ça n'est souvent pas le cas [65]. **Deuxièmement**, elle part du principe que la perception du risque par un profane est faussée. Or, bien que ceux-ci n'aient pas nécessairement toutes les informations de base, souvent, leur représentation du risque est beaucoup plus riche que celle de l'expert. Elle inclut fréquemment d'autres facteurs que de simples probabilités de décès, telles que des considérations sur l'incertitude, la contrôlabilité, les bénéfices associés à la prise de risque et les menaces pour les générations futures ([65], [54], [66] [67], [68]). De par l'usage de méthodes approximatives et à cause de biais dans l'estimation des risques, des experts peuvent être enclins à l'excès de confiance tout autant que des profanes, quand ils doivent aller au-delà des données disponibles [54]. En situation d'incertitude, leurs jugements ne sont pas nécessairement plus exacts [69]. **Troisièmement**, lorsque les partisans d'une technologie donnée invoquent « l'éducation du public », ils parlent plus de persuasion que d'information du public. Cette démarche pose problème car elle part non seulement de l'hypothèse que le communicateur sait ce qui est vrai, mais aussi qu'il sait ce qui est bon et juste pour la société [68]. Au lieu de cela, le public a besoin d'être considéré comme un partenaire légitime et d'être impliqué à la fois dans l'évaluation des risques et dans leur gestion [70]. Les expériences passées ont montré que le public peut contribuer de manière valable à un processus décisionnel dans un domaine scientifique [71]. Une étude de la Commission européenne, en 1979, sur l'acceptation de la technologie par le consommateur va dans le même sens. Le principal enseignement de cette étude, a été que l'anxiété des Européens à l'égard des conséquences du développement scientifique et technique n'est ni indifférenciée ni fermée au raisonnement. C'était particulièrement vrai en ce qui concerne l'idée que des risques peuvent parfois être pris dans la mesure où on joue la sécurité c'est-à-dire que des précautions sont prises (Rapport de la Commission de 1979 cité dans [72]).

Yearly [73] explique comment, reprenant à leur compte les dires des experts scientifiques dans le cadre de l'évaluation des risques, les objectivistes, ont tendance à négliger l'information contextuelle locale et donc aboutir à des conclusions qui s'opposent à l'expérience des populations locales. Selon Wynne [53], c'est cette connaissance locale qui apporte des éléments d'ignorance ou des incertitudes (tels que définis ci-dessus). Wynne affirme en outre que le public est souvent mieux équipé pour trancher des questions en situation d'ignorance et d'indétermination.

De plus, nous affirmons ici que l'indétermination, l'ambiguïté et l'ignorance sont des expressions issues du risque métaphysique et que, de manière surprenante, le profane comprend et exprime dans ses «craintes» la perception des risques métaphysique auxquels il est soumis.

Dés 2005, Laurent et Petit décrivent les craintes associées à l'émergence des nanotechnologies. Ils les représentèrent comme un triangle dont les trois sommets étaient : la peur de la perte de contrôle (l'expérience tourne mal), la crainte du mauvais usage des découvertes, et la peur de la transgression (tenter de surmonter les limites naturelles) [74]. Plus récemment, un projet financé par l'union européenne – DEEPEN-, a permis d'interroger un échantillon de profanes dans toute l'Europe. Des réponses similaires ont été obtenues, et regroupées en cinq récits principaux, qui correspondent partiellement au triangle évoqué ci-dessus et le recouvrent : 1. «Faites attention à ce que vous voulez » (le désir), 2. «Ouvrir la boîte de Pandore" (le mal), 3. « Jouer de manière incontrôlée avec la nature» (sacré), 4. «Maintenus dans l'obscurité» (l'aliénation), et 5. «Les riches s'enrichissent et les pauvres deviennent plus pauvres (exploitation)» [75]. Les histoires que racontent les profanes à propos des nanotechnologies expriment clairement qu'on dépasse là les risques physiques traditionnels pour se concentrer sur les incertitudes et les avantages associés à la technoscience. Il y a un sentiment profond que les nanotechnologies ont le potentiel de «*remodeler toute notre expérience de vie dans le monde* » [75]. Les récits «Ouvrir la boîte de Pandore» et «Jouer de manière incontrôlée avec la nature» traduisent clairement le sentiment du public que, si les promesses des nanotechnologies sont séduisantes, sont également très présents la démesure et le danger d'une action sans garde-fous qui perturberait des frontières présentes de longue date. Peut-être de manière surprenante pour certains, le «public» continue de résister à l'idée des lumières, si chère aux promoteurs des technosciences, que les améliorations technologiques et le progrès social sont indissociables.

Evidemment les réponses du public sont éclairées par l'historique des évolutions technologiques, économiques et sociales et intégrées à des valeurs profondément enracinées. Mais les nanotechnologies introduisent de nouvelles façons de penser la technologie, et des perspectives nouvelles. L'idée de conception prend le rôle central en matière de nanotechnologie, avec en point d'orgue la «*notion de la plasticité infinie et de la potentialité de toutes choses* [76]» - artefact, plantes humains, animaux, de la société.

Peut-être le public exprime-t-il son inquiétude au sujet de ces nouvelles approches et peut-être est-il instinctivement méfiant au sujet du projet métaphysique qui est le fondement des nanotechnologies. Le rapport du projet DEEPEN y fait allusion en suggérant que «*en plus d'une analyse risque/bénéfice sur les sujets économique, scientifique, technologique, ce qui serait nécessaire, c'est une analyse philosophique espoir / risques. Au-delà des narrations relatant les soucis et préoccupations du public sur les nanotechnologies, il faudrait désormais aller au-delà de DEEPEN, et ajouter des histoires d'espoir, d'ambivalence, voire sur les dangers d'espérer. En analysant ces narrations, émergera une notion élargie du «risque» - un risque pour soi et pour la communauté - risque que les espoirs soient déçus ou les principes de base trahis* » [76].

## Une structure d'évaluation « précautionneuse » du nanorisque quelques réflexions

### Combiner principes et critères en cas de risque et d'incertitude

Stirling [80] suggère que le défi en matière de gouvernance du risque technologique est à la fois épistémique (lié aux connaissances) et ontologique (lié à l'essence des nanotechnologies). Les problèmes de nature ontologiques nécessitent résilience et robustesse, car la technologie et la nature réagissent souvent de manière imprévue. Le risque épistémique, à savoir la connaissance incertaine et contestée de dynamiques complexes, est atténué au mieux par la précaution. Le tableau 1 récapitule les risques et les méthodes d'évaluation possibles, et inclut des suggestions de réponses politiques ou de gouvernance.

Après avoir examiné la littérature, Grieger et al. [46] ont estimé que nous sommes dans l'ignorance et l'indétermination quand il s'agit de nanotechnologies et de nanomatériaux. La question est de savoir comment formuler une réponse en matière de gouvernance prenant en compte les précautions à prendre ? A moins d'un changement culturel fondamental aussi bien au sein du gouvernement que de celui de l'industrie, n'y a pas de réponses faciles.

En outre, un problème clé avec les approches actuelles d'évaluation des risques et les cadres de gouvernance a été leur incapacité à intégrer la flexibilité et l'apprentissage (de manière personnalisée et progressive). Il s'agit en particulier des dispositifs pour prendre en compte des « alertes rapides » (pour reconnaître les risques émergents) et une capacité à (ré) agir pour eux. Nous suggérons que l'incorporation d'une telle capacité sera fondamentale pour gérer le risque technologique en général et ceux des nanotechnologies, en particulier.

**Table 1:** (adaptée de Stirling [79]) risques, types of connaissances et option d'évaluation des risque.

| Types d'incertitude         | Connaissance des conséquences | Connaissance des probabilités | Méthodes d'évaluation possibles                                                                                             | Response Politique / Gouvernance    |
|-----------------------------|-------------------------------|-------------------------------|-----------------------------------------------------------------------------------------------------------------------------|-------------------------------------|
| Risque                      | √                             | √                             | Analyse risque/coût –bénéfice<br>Evaluation multicritère<br>Méthodes probabilistes                                          | évaluation traditionnelle du risque |
| Ambiguïté                   | X                             | √                             | Délibération participative<br>Scenarios<br>Analyse rétrospective<br>Représentation multicritère<br>Analyse de points de vue | Précaution                          |
| Incertain                   | √                             | X                             | Heuristiques de l'incertain<br>Analyse d'intervalles<br>Analyse de sensibilité                                              | Précaution                          |
| Ignorance & Indétermination | X                             | X                             | Suivi, recherche<br>Gestion adaptative<br>Apprentissage social/ institutionnel                                              | Précaution                          |

Note: √= oui X = non

## Projet de principes fondamentaux d'évaluation des risques et des critères à utiliser pour les nanotechnologies

La première étape essentielle dans la construction ou l'évaluation d'un cadre de gouvernance des nanorisques est de clarifier le fondement des décisions et les orientations stratégiques. Il s'agit aussi de définir clairement la manière dont la notion de risque est cadrée. Quels sont alors les éléments conceptuels clés ou les principes qui devraient régir une évaluation des risques et donc définir un cadre de gouvernance ? À cet égard un principe reflète un point de vue fondamental sociétal, institutionnel et /ou éthique dans lesquelles certaines options politiques sont totalement incluses ou exclues. Les principes fondamentaux, une fois agréés, devraient être suivis comme une règle et donc, si un principe fondamental est violé, c'est la technologie qui est en question, plutôt que le principe. En revanche les options politiques peuvent également être évaluées au regard de différents critères (par exemple les coûts, les impacts, avantages sociaux) qui peuvent s'opposer, car que la perte sur un critère peut être compensée par un gain dans l'autre.

Du point de vue éthique, Lemons et al. [77] et Shrader-Frechette [66] présentent un certain nombre d'arguments qui incitent à donner priorité à la minimisation du risque (sur-réglementation) sur des considérations économiques ou liées aux bénéfices que la société pourrait tirer (sous-réglementation).

- **D'abord**, on peut considérer qu'il est plus important de protéger le public contre des effets nocifs que d'assurer son bien-être, car la protection contre les effets nocifs semble être une condition nécessaire pour que le public profite d'autres libertés.
- **Deuxièmement**, le public a généralement besoin de plus de protection contre les risques que l'industrie ou les gouvernements qui proposent des technologies risquées. C'est en partie dû au fait que le public a généralement moins de ressources financières et moins d'accès à l'information pour faire face au risque, et qu'il est en outre souvent confronté à des dénis bureaucratiques de l'existence d'un danger ([78], [66], [49]).
- **Troisièmement**, les profanes devraient avoir des droits garantis qui les protègent de décisions « technologiques », qui pourraient menacer leur santé et leur sécurité physique, étant donné que chacun a droit à la sécurité juridique et à la sécurité physique.
- Et **quatrièmement** l'échec d'une minimisation des activités nuisibles reviendrait à instrumentaliser le public pour satisfaire les besoins de l'industrie et la société dans son ensemble. Ce serait une pratique discriminatoire, parce qu'une partie du public aurait à supporter un risque significativement plus élevé sans son consentement alors qu'une autre partie en tirerait avantage ([66], [49]).

Puisqu'on prévoit que les nanotechnologies vont « tout » révolutionner, il est frappant que l'évaluation des risques ait jusqu'ici été réduite au paradigme conventionnel. Pour que les nanotechnologies atteignent vraiment leur potentiel, il sera essentiel que l'évaluation des risques associée soit éthique, adaptative, aille dans le sens de la précaution et réponde aux demandes sociétales. Les principes clés associés à une approche pour la gestion des risques empreinte de précaution peuvent être résumée comme suit (d'après [79]):

- « Prévention » - un devoir de prévenir plutôt que de contrôler.
- « Pollueur-payeur » - les coûts des dommages doivent être supportés par toutes les parties responsables, ou tirant bénéfice de ces dommages.
- « Pas de regrets » - favoriser les options qui satisfont simultanément des critères économiques, environnementaux et au delà, et si ça n'est pas le cas envisager des alternatives techniques
- « Production propre » - n'adopter que des technologies qui ont démontré qu'elles avaient un faible impact.
- « Biocentrage » - reconnaître la valeur intrinsèque de la vie autre qu'humaine et reconnaître la vulnérabilité de l'environnement naturel.
- Connaissance limitée - reconnaître les limites de la science, de nos connaissances et la possibilité d'une surprise.
- Défendre les droits de ceux qui sont affectés négativement par les technologies.

En effet, en utilisant une approche de précaution plutôt qu'un cadre d'évaluation des risques, la science et la recherche scientifique seront à nouveau capables de tenir le rôle qui est le leur dans la société: fournir des

informations pour la prise de décision politique, mais ne pas prescrire ce que doit faire la société. Cette dernière action est du ressort de la société dans son ensemble.

Si nous acceptons que l'univers des nanorisques puisse être décrit par les concepts tels que l'incertitude, l'indétermination, l'ambiguïté et l'ignorance (définis ci-dessus), la seconde étape essentielle pour construire et évaluer un cadre de gouvernance des nanorisques est de clarifier les critères à partir desquels les risques sont évalués et comment ceux-ci influencent les décisions politiques et les directions prises. Les « critères » doivent être définis comme des facteurs à prendre en compte lors du choix ou lors de la comparaison entre le pour et le contre de différentes options, étant donné que, comme discuté ci-dessus, les principes fondamentaux, sont respectés.

L'approche restreinte et l'approche de précaution (bien que ce soit, à l'occasion, contesté) sont toutes deux fondées sur une évaluation «scientifique» de la technologie. Ce qui les différencie, c'est leur point de vue sur la connaissance et le rôle donné à des considérations plus larges sur la société. Le régime qui prévaut actuellement, l'approche restreinte correspond à une manière de voir unique, fait confiance aux connaissances, fait porter la charge de la preuve aux sceptiques, exclut les alternatives, met en avant les bénéfices de ces technologies et met l'accent sur les droits de l'industrie. Cela se démarque d'un cadre d'évaluation large qui autorise une pluralité de filtres, reconnaît différents types de savoirs, fait porter la charge de la preuve aux défenseurs de la technologie, demande à ce que les avantages soient justifiés et prend en compte les droits de la société au sens large [79].

En conclusion pour garantir le «succès» des nanotechnologies, des produits à base de nanomatériaux et de nanotechnologies, nous avons besoin d'un cadre d'évaluation des nanorisques qui adhère aux principes de précaution décrits ci-dessus, utilise des critères d'évaluation des risques transparents (connus de tous), adaptatifs (flexibles et ouverts au changement / capables d'apprendre) et intègre les connaissances à la fois qualitatives et quantitatives.

## References

- [1] R.P. Feynman, There's plenty of room at the bottom - transcript of talk, 1959.
- [2] N. Taniguchi, On the Basic Concept of 'Nano-Technology', Proceedings of the International Conference on Precision Engineering Part II, Japan Society of Precision Engineering, Tokyo, 1974.
- [3] H.W. Kroto, J.R. Heath, S.C. O'Brien, R.F. Curl, R.E. Smalley, C60: Buckminsterfullerene, *Nature* (1985) 162-163.
- [4] S. Iijima, Helical microtubules of graphitic carbon, *Nature Biotechnology* (1991) 56–58.
- [5] G. Binnig, H. Rohrer, C. Gerber, E. Weibel, Surface Studies by Scanning Tunnelling Microscopy, *Physical Review Letters* (1982) 57-61.
- [6] A. McWilliams, *Nanotechnology: A Realistic Market Assessment*, BCC Research, 2010.
- [7] M. Berger, Debunking the trillion dollar nanotechnology market size hype, *Nanowerk*, 2007.
- [8] M.C. Roco, The emergence and policy implications of converging new technologies integrated from the nanoscale, *Journal of Nanoparticle Research* 7 (2005) 129–143.
- [9] RS/RAE, *Nanoscience and nanotechnologies: opportunities and uncertainties*, Royal Society & Royal Academy of Engineering, London, 2004.
- [10] UK\_Government, *UK Nanotechnologies Strategy: small technologies, great opportunities*, 2010.
- [11] D. Fedrigo, R. Senjen, *Shaping innovation: policy approaches on innovation governance the case of nanotechnology*, *Nanotechnologies in the 21st century*, Brussels, 2010.
- [12] ETC, *The Big Down: Atomtech - Technologies Converging at the Nano-scale*, 2003.
- [13] J. Macoubrie, *Informed Public Perceptions of Nanotechnology and Trust in Government*, Woodrow Wilson International Centre for Scholars, Washington, 2005.
- [14] Q. Chaudhry, J. Blackburn, P. Floyd, C. George, T. Nwaogu, A. Boxall, R. Aitken, *Final Report: A scoping study to identify gaps in environmental regulation for the products and applications of nanotechnologies*, Defra, London, 2006.
- [15] K. Gavelin, R. Wilson, R. Donaldson, *Democratic technologies? The final report of the Nanotechnology Engagement Group (NEG)*, Involve, London, 2007.
- [16] M. Powell, New risk or old risk? How scientists' standpoints shape their nanotechnology risk frames, *Health, Risk & Society* 9 (2007) 173-190.
- [17] K. Kjølberg , G.C. Delgado-Ramos, F. Wickson , R. Strand T, *Models of governance for converging technologies*, *Technology Analysis & Strategic Management* 20 (2008) 83-97.
- [18] A. Mnyusiwalla, A.S. Daar, P.A. Singer, *Mind the gap: science and ethics in nanotechnology*, *Nanotechnology* (2003) 9-13.
- [19] K. Kulinowski, *Nanotechnology: from 'wow' to 'yuck.'* *Bulletin of Science, Technology, and Society* (2004) 13-20.
- [20] S. Wood, A. Geldart, R. Jones, *Crystallizing the Nanotechnology Debate*, *Technology Analysis and Strategic Management* 20 (2008) 13-27.
- [21] R. Sandler, W.D. Kay, *The GMO-Nanotech (dis)analogy*, *Bulletin of Science Technology and Society* 26 (2006) 57-62.
- [22] O. Renn, *Concepts of risk: an interdisciplinary review - Part 1: disciplinary concepts*, *GAIA* 17 (2008) 50-66.
- [23] F. Wickson, F. Gillund, A.I. Myhr, *Treating nanoparticles with precaution: recognising qualitative uncertainty in scientific risk assessment*, in: K.L.a.F.W. Kjølberg (Ed.), *Nano meets macro- social perspectives on nanoscale sciences and technologies*, Pan Stanford Publishing, Singapore, 2010, pp. 445-472.
- [24] Meridian Institute, *Nanotechnology and the poor: opportunities and risks - closing the gaps within and between sectors of society*, (2005).
- [25] E. Court, A.S. Daar, E. Martin, T. Acharya, P.A. Singer, *Will Prince Charles et al diminish the opportunities of developing countries in nanotechnology?*, *nanotechweb.org*, 2004.
- [26] ETC, *The little big down: a small introduction to nano-scale technologies*. available at: <http://www.etcgroup.org/upload/publication/104/01/littlebigdown.pdf> accessed 6th Oct 2010, 2004.

- [27] B. Park, K. Donaldson, R. Duffin, L. Tran, F. Kelly, I. Mudway, J.-P. Morin, R. Guest, P. Jenkinson, Z. Samaras, M. Giannouli, H. Kouridis, P. Martin, Hazard and Risk Assessment of a Nanoparticulate Cerium Oxide-Based Diesel Fuel Additive -A Case Study, *Inhalation Toxicology* 20 (2008) 547-566.
- [28] N.C. Mueller, B. Nowack, Exposure modelling of engineered nanoparticles in the Environment, *Environmental Science Technology* 42 (2008) 4447–4453.
- [29] European Commission JRC, Technical Guidance Document on Risk Assessment in support of Commission Directive 93/67/EEC on Risk Assessment for new notified substances Commission Regulation (EC) No 1488/94 on Risk Assessment for existing substances Directive 98/8/EC of the European Parliament and of the Council concerning the placing of biocidal products on the market Part I. EUR 20418 EN/1. European Communities, 2003.
- [30] S.F. Hansen, Regulation and risk assessment of Nanomaterials – too little, too late?, Department of Environmental Engineering Technical University of Denmark, Lyngby, 2009.
- [31] G. Oberdorster, E. Oberdorster, J. Oberdorster, Nanotoxicology: An emerging discipline evolving from studies of ultrafine particles, *Environmental Health Perspectives* (2005) 823-839.
- [32] S.F. Hansen, B.H. Larsen, S.I. Olsen, A. Baun, Categorization framework to aid Hazard Identification of Nanomaterials, *Nanotoxicology* 1 (2007) 243-250.
- [33] I. Beck-Speier, N. Dayal, E. Karg, K.L. Maier, C. Roth, A. Ziesenis, J. Heyder, Agglomerates of ultrafine particles of elemental carbon and TiO<sub>2</sub> induce generation of lipid mediators in alveolar macrophages, *Environmental Health Perspectives* (2001) 613-618.
- [34] C.C. Berry, S. Wells, S. Charles, G. Aitchison, A.S.G. Curtis, Cell response to dextran-derivatised iron oxide nanoparticles post internalisation, *Biomaterials* 25 (2004) 5405-5413.
- [35] M.D. Cheng, Effects of nanophase materials ( $\leq 20$  nm) on biological responses, *J Environ Science Heal A* 39 (2004) 2691-2705.
- [36] P.R. Lockman, J.M. Koziara, R.J. Mumper, D.D. Allen, Nanoparticle surface charges alter blood-brain barrier integrity and permeability, *J Drug Target* (2004) 635-641.
- [37] S.S. Nigavekar, L.Y. Sung, M. Llanes, A. El-Jawahri, T.S. Lawrence, C.W. Becker, L. Balogh, M.K. Khan, H-3 dendrimer nanoparticle organ/tumour distribution, *Pharmaceutical Research* (2004) 476-483.
- [38] C.M. Sayes, J.D. Fortner, W. Guo, D. Lyon, A.M. Boyd, K.D. Ausman, Y.J. Tao, B. Sitharaman, L.J. Wilson, J.B. Hughes, J.L. West, V.L. Colvin, The differential cytotoxicity of water-soluble fullerenes, *Nano Letters* 4 (2004) 1881-1887.
- [39] C. Baker, A. Pradhan, L. Pakstis, D.J. Pochan, S. S.I., Synthesis and antibacterial properties of silver nanoparticles. , *Journal of Nanoscience Nanotechnology* (2005) 244-249.
- [40] F.J. Martin, K. Melnik, T. West, J. Shapiro, M. Cohen, A.A. Boiarski, M. Ferrari, Acute toxicity of intravenously administered microfabricated silicon dioxide drug delivery particles in mice, *Drugs Research Development* (2005) 71-81.
- [41] J.D. Fortner, D.Y. Lyon, C.M. Sayes, A.M. Boyd, J.C. Falkner, E.M. Hotze, L.B. Alemany, Y.J. Tao, W. Guo, K.D. Ausman, V.L. Colvin, J.B. Hughes, C-60 in water: Nanocrystal formation and microbial response, *Environmental Science Technology* 39 (2005) 4307-4316.
- [42] T. Brunner, P. Piusmanser, P. Spohn, R. Grass, L. Limbach, A. Bruinink, W. Stark, In Vitro Cytotoxicity of Oxide Nanoparticles: Comparison to Asbestos, Silica, and the Effect of Particle Solubility, *Environmental Science Technology* 40 (2006) 4374-4381.
- [43] CCA, Small Is Different: A Science Perspective On The Regulatory Challenges of the Nanoscale. Ottawa: The Council of Canadian Academies, (2008).
- [44] M.C. Powell, M.P.A. Griffin, S. Tai, Bottom-up risk regulation? How nanotechnology risk knowledge gaps challenge federal and state environmental agencies, *Environmental Management* (2008) 426–443.
- [45] D.B. Resnik, S.S. Tinkle, Ethical issues in clinical trials involving nanomedicine, *Contemporary clinical trials* 28 (2007) 433-441.



- [46] K.D. Grieger, S.F. Hansen, A. Baun, The known unknowns of nanomaterials: Describing and characterizing uncertainty within environmental, health and safety risks, *Nanotoxicology* 3 (2009) 222-233.
- [47] S. Brown, The new deficit model, *Nature nanotechnology* 4 (2009) 609-612.
- [48] K.S. Shrader-Frechette, Practical Ecology and Foundations for Environmental Ethics, *Journal of Philosophy* 92 (1995) 621-635.
- [49] K. S. Shrader-Frechette, *Burying Uncertainty*, University of California Press, London, 1993.
- [50] S.O. Hansson, Philosophical Perspectives on Risk, *Techné* 8 (2004) 10 - 33.
- [51] R. Sclove, *Reinventing technology assessment - a 21st century model*, Science and Technology Innovation Program, Woodrow Wilson International Centre for Scholars, Washington, DC 2010.
- [52] J.-P. Dupuy, A. Grinbaum, Living with uncertainty: toward the ongoing normative assessemnt of nanotechnology, *Techne* 8 (2004) 4-25.
- [53] B. Wynne, Uncertainty and environmental learning, *Global Environmental Change* 2 (1992) 112-127.
- [54] P. Slovic, Facts versus fears: Understanding perceived risk., in: Kahneman D., Slovic P., Tversky A. (Eds.), *Judgment under Uncertainty: Heuritics and Biases*, Cambridge University Press, 1982, pp. 463-489.
- [55] P. Slovic, Beyond numbers: A broader perspective on risk perception and risk communication., in: D.G. Mayo, R.D. Hollander (Eds.), *Acceptable Evidence*, Oxford University Press, 1991, pp. 48-65.
- [56] O. Renn, White paper on risk governance: towards and integrative approach. White Paper No. 1. , International Risk Governance Council, Geneva, 2005.
- [57] W.E. Bijker, I.D. de Beaufort, A. van den Berg, P.J.A. Borm, W.J.G. Oyen, G.T. Robillard, et al, A response to 'Nanotechnology and the need for risk governance' O. Renn & M. C. Roco, 2006. *J. Nanoparticle Research* 8(2): 153-191 , *Journal of Nanoparticle Research* 9 (2007) 1217-1220.
- [58] K. Kjølberg, G.C. Delgado-Ramos, F. Wickson , R. Strand, Models of governance for converging technologies, *Technology Analysis & Strategic Management* 20 (2008) 83-97.
- [59] O. Renn, M. Roco, White paper on nanotechnology risk governance No 2, International Risk Governance Council., Geneva, 2006.
- [60] J.-P. Dupuy, Some pitfalls in the philosophical foundations of nanoethics, *Journal of Medicine and Philosophy* 32 (2007).
- [61] A. Ferrari, Is it all about human nature? Ethical challenges of converging technologies beyond a polarized debate *Innovation: The European Journal of Social Science Research* 21 (2008) 1-24.
- [62] A. Nordman, Enhancing material nature, in: K. Kjølberg , F. Wickson (Eds.), *Nano meets macro - social perspectives on nanoscale sciences and technologies*, Pan Stanford Publishing, Singapore, 2010, pp. 283-303.
- [63] B. Flyvbjerg, *Making social science matter: why social inquiry fails and how it can succeed again*, Cambridge University Press, Cambridge, 2001.
- [64] L. Frewer, A. Fisher, Nanotechnology in Foods: Understanding public response to its risks and benefits, in: K. Kjølberg , F. Wickson (Eds.), *Nano meets marco - social perspectives on naoscale sciences and technology*, Pan Stanford Publishing, Singapore, 2010, pp. 225-243.
- [65] K.S. Shrader-Frechette, Scientific method, anti-foundationalism and public decision making, *Risk* (1990).
- [66] K.S. Shrader-Frechette, *Risk and Rationality*, University of California Press Ltd., Berkeley, 1991.
- [67] R.E. Kasperson, J.X. Kasperson, Hidden hazards in *Acceptable Evidence* in: D.G. Mayo, H. R.D. (Eds.), *Acceptable Evidence: Science and Values in Risk Management*, Oxford University Press, Oxford, 1991, pp. 9-28.
- [68] H.P. Peters, Mass Media as an Information Channel and Public Arena, *Risk Health Safety Environment* (1994) 241-250.

- [69] D. Kahneman, A. Tversky, Subjective probability: a judgment of representativeness in: D. Kahneman, P. Slovic, A. Tversky (Eds.), *Judgment under Uncertainty: Heuristics and Biases* Cambridge University Press, Cambridge, 1982, pp. 32-47.
- [70] V.T. Covello, P.M. Sandman, P. Slovic, Guidelines for communicating information about chemical risks effectively and responsibly, in: D.G. Mayo, H. R.D. (Eds.), *Acceptable Evidence* Oxford University Press, Oxford, 1991, pp. 66-90.
- [71] J.A. Tickner, Children's environmental health: A case study in implementing the precautionary principle, *International journal of Occupational and Environmental Health* (2000) 281-288.
- [72] S.A. Feenstra, Consumer acceptance of irradiated foods, in: S. Thorne (Ed.), *Food Irradiation*, Elsevier Applied Science, 1991, pp. 97-128.
- [73] S. Yearley, Making systematic sense of public discontents with expert knowledge: two analytical approaches and a case study, *Public Understanding of Science* 9 (2000) 105-122.
- [74] L. Laurent, J.-C. Petit, Nanosciences and its convergence with other technologies- new golden age or apocalypse? *Hyle* 11 (2005) 45-76.
- [75] S. Davies, P. Macnaghten, M. Kearnes, *Reconfiguring Responsibility: Lessons for Public Policy (Part 1 of the report on Deepening Debate on Nanotechnology)*, Durham University, Durham 2009.
- [76] A. Ferrari, A. Nordmann, *Reconfiguring Responsibility: Lessons for Nanoethics (Part 2 of the report on Deepening Debate on Nanotechnology)*. , Durham University, Durham, 2009.
- [77] J. Lemons, K.S. Shrader-Frechette, C. Cranor, The precautionary principle: Scientific uncertainty and type I and type II errors, *Foundations of Science* 2 (1997) 207-236.
- [78] D. Ozonoff, L.I. Boden, 1987. Truth and consequences: Health agency responses to environmental health problems, *Science, Technology and Human Values* (1987) 70-77.
- [79] A. Stirling, *On science and precaution in the management of technological risk*, European Commission - JRC Institute Prospective Technology, Brussels, 1999.
- [80] A. Stirling, *From Precaution to Robustness: in governance of technological vulnerability, The vulnerability of technological Cultures: new directions in research and governance (workshop)*, Maastricjt, Netherlands, 2008.
- [81] M. Kearnes, Macnaghten P., Wilsdon, J. *Governing at the Nanoscale. Demos*, (2006); available at <<http://www.demos.co.uk/publications/governingatthenanoscale>>.)
- [82] SwissRe, *Nanotechnology: small matter, many unknowns*. (2004), Zurich available at: [www.swissre.com](http://www.swissre.com)
- [83] Poland CA, Duffin R, Kinloch I, Maynard A, Wallace WA, Seaton A, et al: Carbon nanotubes introduced into the abdominal cavity of mice show asbestos-like pathogenicity in a pilot study. *Nature Nanotechnology* 2008, 3:423-428.
- [84] Donaldson, K, Murphy, FA, Duffin, R, Poland CA, *Asbestos, carbon nanotubes and the pleural mesothelium: a review of the hypothesis regarding the role of long fibre retention in the parietal pleura, inflammation and mesothelioma*. *Particle and Fibre Toxicology*, (2010), 7:5 available at: <http://www.particleandfibretoxicology.com/content/7/1/5>
